# Supplementary material for: Another Day, Another 82 Cents: A National Survey Assessing Gender-based Wage Differences in Board-certified Plastic Surgeons
Source: PubMed Central journal article supplement — Plast Reconstr Surg Glob Open. 2023 Aug 15;11(8):e5196. doi: 10.1097/GOX.0000000000005196 (PMC10427058; doi:10.1097/gox.0000000000005196), 2023-08-15
Supplement: gox-11-e5196-s002.pdf [file gox-11-e5196-s002.pdf]

**2021 - Gender Trends in Plastic and Reconstructive Surgeons**

| ASPS Practice Type                                                | Survey Population |     |     | Survey Responders |     |     | Survey non responders |     |     |
|-------------------------------------------------------------------|-------------------|-----|-----|-------------------|-----|-----|-----------------------|-----|-----|
| Academic                                                          | 410               | 14% | 16% | 66                | 23% | 25% | 344                   | 13% | 15% |
| Academic Practice (salaried with private practice)                | 53                | 2%  |     | 6                 | 2%  |     | 47                    | 2%  |     |
| Employed Physician                                                | 209               | 7%  | 7%  | 25                | 9%  | 9%  | 184                   | 7%  | 7%  |
| Solo                                                              | 1151              | 40% | 45% | 110               | 38% | 40% | 1041                  | 41% | 46% |
| Solo practice-shared facility                                     | 143               | 5%  |     | 7                 | 2%  |     | 136                   | 5%  |     |
| Large multi-specialty group practice (more than 20 physicians)    | 225               | 8%  | 30% | 13                | 4%  | 25% | 212                   | 8%  | 31% |
| Large plastic surgery group practice (6 or more plastic surgeons) | 89                | 3%  |     | 9                 | 3%  |     | 80                    | 3%  |     |
| Small plastic surgery group practice (2-5 plastic surgeons)       | 498               | 17% |     | 43                | 15% |     | 455                   | 18% |     |
| Medium multi-specialty group practice (6-20 physicians)           | 52                | 2%  |     | 8                 | 3%  |     | 44                    | 2%  |     |
| Military                                                          | 23                | 1%  | 1%  | 2                 | 1%  | 1%  | 21                    | 1%  | 1%  |

| ASPS Practice Demographic         | Survey Population |     | Survey Responders |     | Survey non responders |     |
|-----------------------------------|-------------------|-----|-------------------|-----|-----------------------|-----|
| 50% Reconstructive & 50% Cosmetic | 594               | 21% | 46                | 16% | 548                   | 22% |
| 25% Reconstructive & 75% Cosmetic | 531               | 19% | 44                | 15% | 487                   | 19% |
| 75% Reconstructive & 25% Cosmetic | 799               | 28% | 102               | 36% | 697                   | 27% |
| 100% Cosmetic                     | 529               | 19% | 55                | 19% | 474                   | 19% |
| 100% Reconstructive               | 371               | 13% | 37                | 13% | 334                   | 13% |

| ASPS Gender | Survey Population |     | Survey Responders |     | Survey non responders |     |
|-------------|-------------------|-----|-------------------|-----|-----------------------|-----|
| Female      | 596               | 20% | 111               | 37% | 484                   | 18% |
| Male        | 2396              | 80% | 192               | 63% | 2204                  | 82% |

| ASPS Age    | Survey Population |     | Survey Responders |     | Survey non responders |     |
|-------------|-------------------|-----|-------------------|-----|-----------------------|-----|
| Under 35    | 36                | 1%  | 8                 | 3%  | 28                    | 1%  |
| 35 - 44     | 752               | 25% | 84                | 28% | 668                   | 25% |
| 45 - 54     | 863               | 29% | 73                | 24% | 790                   | 29% |
| 55 - 64     | 808               | 27% | 73                | 24% | 735                   | 27% |
| 65 and over | 525               | 18% | 65                | 21% | 460                   | 17% |

| ASPS Member Years | Survey Population |     | Survey Responders |     | Survey non responders |     |
|-------------------|-------------------|-----|-------------------|-----|-----------------------|-----|
| Less than 5       | 440               | 16% | 45                | 17% | 395                   | 16% |
| 5 - 9 years       | 420               | 15% | 31                | 12% | 389                   | 16% |
| 10 - 14 years     | 405               | 15% | 38                | 14% | 367                   | 15% |
| 15 - 19 years     | 421               | 16% | 43                | 16% | 378                   | 15% |
| 20 - 24 years     | 355               | 13% | 32                | 12% | 323                   | 13% |
| 25 years or more  | 670               | 25% | 78                | 29% | 592                   | 24% |

| Division           | Survey Population |     | Survey Responders |     | Survey non responders |     |
|--------------------|-------------------|-----|-------------------|-----|-----------------------|-----|
| South Atlantic     | 641               | 21% | 60                | 20% | 581                   | 22% |
| Pacific            | 551               | 18% | 49                | 16% | 502                   | 19% |
| East North Central | 366               | 12% | 46                | 15% | 320                   | 12% |
| Middle Atlantic    | 421               | 14% | 38                | 13% | 383                   | 14% |
| West South Central | 360               | 12% | 37                | 12% | 323                   | 12% |
| Mountain           | 215               | 7%  | 25                | 8%  | 190                   | 7%  |
| East South Central | 144               | 5%  | 15                | 5%  | 129                   | 5%  |
| West North Central | 149               | 5%  | 14                | 5%  | 135                   | 5%  |
| New England        | 145               | 5%  | 19                | 6%  | 126                   | 5%  |

**Non-Responder Analysis/<20% response-rate Justification:**

After analyzing the characteristics of nonresponders, it is determined that the sample is representative of the target survey population. Further, women in plastic surgery are well represented, which was of particular interest to us in our study because they comprise a smaller portion of the field. Although this survey has an effective response rate of 9.7%, we feel that this is justified because our survey has responses from individuals of diverse backgrounds. Responses were gathered from plastic surgeons of all different geographic areas, practice structures, and subspecialties and both male and female genders were well represented.
