# Supplementary material for: Another Day, Another 82 Cents: A National Survey Assessing Gender-based Wage Differences in Board-certified Plastic Surgeons
Source: PubMed Central journal article supplement — Plast Reconstr Surg Glob Open. 2023 Aug 15;11(8):e5196. doi: 10.1097/GOX.0000000000005196 (PMC10427058; doi:10.1097/gox.0000000000005196), 2023-08-15
Supplement: gox-11-e5196-s003.pdf [file gox-11-e5196-s003.pdf]

### Supplemental Digital Content 3.

A) Cohort characteristics of those who answered questions 4, 5, and 7 which asked about the respondent's family and if family responsibilities had negatively affected their professional advancement? (N=288)

| Characteristic                                       | Male<br>(n=177) | Female<br>(n=111) | P-value |
|------------------------------------------------------|-----------------|-------------------|---------|
| Are you married?                                     |                 |                   | 0.0212  |
| Yes                                                  | 159 (89.83%)    | 89 (80.18%)       |         |
| No                                                   | 18 (10.17%)     | 22 (19.82%)       |         |
| Do you have children?                                |                 |                   | 0.0290  |
| Yes                                                  | 157 (88.70%)    | 88 (79.28%)       |         |
| No                                                   | 20 (11.30%)     | 23 (20.72%)       |         |
| Negative effect on professional advancement? (n=281) |                 |                   | 0.0002  |
| Yes                                                  | 30 (16.95%)     | 41 (36.94%)       |         |
| No                                                   | 141 (79.66%)    | 69 (62.16%)       |         |

**B) Responses to Question 6 which show differences in the timing of the first child's birth for respondents who reported they have children (n=245).**

|                           | <b>Male<br/>(n=157)</b> | <b>Female<br/>(n=88)</b> | <b>P-value</b> |
|---------------------------|-------------------------|--------------------------|----------------|
| Prior to medical school   |                         |                          | 1.0000         |
| Yes                       | 3 (1.91%)               | 1 (1.14%)                |                |
| No                        | 154 (98.09%)            | 87 (98.86%)              |                |
| During medical school     |                         |                          | 0.0575         |
| Yes                       | 14 (8.92%)              | 2 (2.27%)                |                |
| No                        | 143 (91.08%)            | 86 (97.73%)              |                |
| During training           |                         |                          | 0.0354         |
| Yes                       | 95 (60.51%)             | 41 (46.59%)              |                |
| No                        | 62 (39.49%)             | 47 (53.41%)              |                |
| After training completion |                         |                          | 0.0169         |
| Yes                       | 92 (58.60%)             | 65 (73.86%)              |                |
| No                        | 65 (41.40%)             | 23 (26.14%)              |                |
