# Supplementary material for: Another Day, Another 82 Cents: A National Survey Assessing Gender-based Wage Differences in Board-certified Plastic Surgeons
Source: PubMed Central journal article supplement — Plast Reconstr Surg Glob Open. 2023 Aug 15;11(8):e5196. doi: 10.1097/GOX.0000000000005196 (PMC10427058; doi:10.1097/gox.0000000000005196), 2023-08-15
Supplement: gox-11-e5196-s004.pdf [file gox-11-e5196-s004.pdf]

**Supplemental Digital Content 4.**

A) Board certification and age of training completion for male and female respondents, subcategorized with consideration of those who completed integrated and independent pathways based on responses to Questions 10, 11, 12, 13, 14, and 15.

|                                                               | <b>Male</b><br><b>(Integrated: n=47</b><br><b>Independent n = 126)</b> | <b>Female</b><br><b>(Integrated: n=57</b><br><b>Independent: n=54)</b> | <b>P-value</b> |
|---------------------------------------------------------------|------------------------------------------------------------------------|------------------------------------------------------------------------|----------------|
| Integrated respondents - year of training completion (n=99)   |                                                                        |                                                                        | 0.0064         |
| Mean (SD)                                                     | 2005 (11)                                                              | 2011 (8)                                                               |                |
| Range                                                         | 1978-2019                                                              | 1987-2020                                                              |                |
| Independent respondents – year of training completion (n=171) |                                                                        |                                                                        | 0.0007         |
| Mean (SD)                                                     | 1996 (11)                                                              | 2003 (12)                                                              |                |
| Range                                                         | 1975-2019                                                              | 1979-2020                                                              |                |
| Integrated – age training completion (n=103)                  |                                                                        |                                                                        | 0.5560         |
| <30                                                           |                                                                        |                                                                        |                |

|                                                  |             |             |        |
|--------------------------------------------------|-------------|-------------|--------|
| 30-35                                            | 2 (4.26%)   | 0 (0.00%)   |        |
| 36-40                                            | 36 (76.60%) | 46 (80.70%) |        |
| >40                                              | 7 (14.89%)  | 9 (15.79%)  |        |
|                                                  | 1 (2.13%)   | 2 (3.51%)   |        |
| Independent – age training completion            |             |             | 0.0600 |
| <30                                              | 1 (0.79%)   | 2 (3.70%)   |        |
| 30-35                                            | 92 (73.02%) | 40 (74.07%) |        |
| 36-40                                            | 32 (25.40%) | 9 (16.67%)  |        |
| >40                                              | 1 (0.79%)   | 3 (5.56%)   |        |
| Integrated – further fellowship training (n=103) |             |             | 0.3851 |
| Yes                                              | 26 (55.32%) | 37 (64.91%) |        |
| No                                               | 20 (42.55%) | 20 (35.09%) |        |
| Independent – further fellowship training        |             |             | 0.0824 |
| Yes                                              | 50 (39.68%) | 29 (53.70%) |        |
| No                                               | 76 (60.32%) | 25 (46.30%) |        |

**B)** Respondents who completed further fellowship specialization following plastic surgery training were asked the year of completion, type of fellowship, and reason for further specializing in Questions 16, 17, and 18 and responses were compared between men and women (n=142).

|                                       | <b>Male<br/>(n=76)</b> | <b>Female<br/>(n=66)</b> | <b>P-value</b> |
|---------------------------------------|------------------------|--------------------------|----------------|
| Year of fellowship completion (n=132) |                        |                          | <0.0001        |
| Mean (SD)                             | 2000 (12)              | 2010 (10)                |                |
| Range                                 | 1976-2021              | 1988-2021                |                |
| Fellowship type - Aesthetic Surgery   |                        |                          | 0.5940         |
| Yes                                   | 19 (25.00%)            | 14 (21.21%)              |                |
| No                                    | 57 (75.00%)            | 52 (78.79%)              |                |
| Fellowship type - Body Contouring     |                        |                          | 1.0000         |
| Yes                                   | 3 (3.95%)              | 3 (4.55%)                |                |
| No                                    | 73 (96.05%)            | 63 (95.45%)              |                |
| Fellowship type - Burn Surgery        |                        |                          | 0.6234         |
| Yes                                   | 3 (3.95%)              | 1 (1.52%)                |                |

|                                            |             |              |        |
|--------------------------------------------|-------------|--------------|--------|
| No                                         | 73 (96.05%) | 95 (98.48%)  |        |
| Fellowship type - Craniofacial Surgery     |             |              | 0.4231 |
| Yes                                        | 18 (23.68%) | 12 (18.18%)  |        |
| No                                         | 58 (76.32%) | 54 (81.82%)  |        |
| Fellowship type - Gender Confirmation      |             |              | 0.4990 |
| Yes                                        | 2 (2.63%)   | 0 (0.00%)    |        |
| No                                         | 74 (97.37%) | 66 (100.00%) |        |
| Fellowship type - Hand and Upper Extremity |             |              | 0.0605 |
| Yes                                        | 27 (35.53%) | 14 (21.21%)  |        |
| No                                         | 49 (64.47%) | 52 (78.79%)  |        |
| Fellowship type - Microsurgery             |             |              | 0.1966 |
| Yes                                        | 20 (26.32%) | 24 (36.36%)  |        |
| No                                         | 56 (73.68%) | 42 (63.64%)  |        |
| Fellowship type - Pediatric Surgery        |             |              | 0.2158 |
| Yes                                        | 5 (6.58%)   | 1 (1.52%)    |        |
| No                                         | 71 (93.42%) | 65 (98.48%)  |        |

|                                         |             |              |        |
|-----------------------------------------|-------------|--------------|--------|
| Fellowship type - Wound Care (Other)    |             |              | 1.0000 |
| Yes                                     | 1 (1.32%)   | 0 (0.00%)    |        |
| No                                      | 75 (98.68%) | 66 (100.00%) |        |
| Fellowship type - Breast                |             |              | 0.6635 |
| Yes                                     | 2 (2.63%)   | 3 (4.55%)    |        |
| No                                      | 74 (97.37%) | 63 (95.45%)  |        |
| Fellowship type - Research              |             |              | 1.0000 |
| Yes                                     | 2 (2.63%)   | 2 (3.03%)    |        |
| No                                      | 74 (97.37%) | 64 (96.97%)  |        |
| Reason for fellowship (n=136)           |             |              | 0.0725 |
| Career Satisfaction                     | 1 (1.32%)   | 3 (4.55%)    |        |
| Desire to increase career opportunities | 6 (7.89%)   | 10 (15.15%)  |        |
| Desire to increase expertise/skill      | 62 (81.58%) | 42 (63.64%)  |        |
| Mentorship                              | 4 (5.26%)   | 5 (7.58%)    |        |
| Required or Timing                      | 0 (0.00%)   | 3 (4.55%)    |        |

---

C) Respondents who did not complete a fellowship were asked why they did not complete further training in Question 19 and responses compared between males and females (n=141).

|                                              | <b>Male</b><br><b>(n=96)</b> | <b>Female</b><br><b>(n=45)</b> | <b>P-value</b> |
|----------------------------------------------|------------------------------|--------------------------------|----------------|
| Reason for not completing fellowship (n=139) |                              |                                | 0.3116         |
| Adequately prepared w/out fellowship         | 66 (68.75%)                  | 33 (73.33%)                    |                |
| Age at training completion                   | 6 (6.25%)                    | 6 (13.33%)                     |                |
| Delayed higher income                        | 6 (6.25%)                    | 0 (0.00%)                      |                |
| Family/household responsibilities            | 13 (13.54%)                  | 5 (11.11%)                     |                |
| Other                                        | 3 (3.13%)                    | 1 (2.22%)                      |                |
