# Supplementary material for: Another Day, Another 82 Cents: A National Survey Assessing Gender-based Wage Differences in Board-certified Plastic Surgeons
Source: PubMed Central journal article supplement — Plast Reconstr Surg Glob Open. 2023 Aug 15;11(8):e5196. doi: 10.1097/GOX.0000000000005196 (PMC10427058; doi:10.1097/gox.0000000000005196), 2023-08-15
Supplement: gox-11-e5196-s006.pdf [file gox-11-e5196-s006.pdf]

### Supplemental Digital Content 6.

A) Participant practice settings including geographic and structural based on responses to Questions 22, 23, and 24 with comparison of males to females (N=288).

|                                   | <b>Male</b>    | <b>Female</b>  | <b>P-value</b> |
|-----------------------------------|----------------|----------------|----------------|
|                                   | <b>(n=177)</b> | <b>(n=111)</b> |                |
| Practice location - West USA      |                |                | 0.2011         |
| Yes                               | 45 (25.42%)    | 21 (18.92%)    |                |
| No                                | 132 (74.58%)   | 90 (81.08%)    |                |
| Practice location - Midwest USA   |                |                | 0.0816         |
| Yes                               | 27 (15.25%)    | 26 (23.42%)    |                |
| No                                | 150 (84.75%)   | 85 (76.58%)    |                |
| Practice location - South USA     |                |                | 0.4044         |
| Yes                               | 61 (34.46%)    | 33 (29.73%)    |                |
| No                                | 116 (65.54%)   | 78 (70.27%)    |                |
| Practice location - Northeast USA |                |                | 0.2012         |
| Yes                               | 32 (18.08%)    | 27 (24.32%)    |                |

|                                     |               |              |        |
|-------------------------------------|---------------|--------------|--------|
| No                                  | 145 (81.92%)  | 84 (75.68%)  |        |
| Practice location - Internationally |               |              | 0.3854 |
| Yes                                 | 0 (0.00%)     | 1 (0.90%)    |        |
| No                                  | 177 (100.00%) | 110 (99.10%) |        |
| Practice location - Urban           |               |              | 0.0224 |
| Yes                                 | 84 (47.46%)   | 68 (61.26%)  |        |
| No                                  | 93 (52.54%)   | 43 (38.74%)  |        |
| Practice location - Suburban        |               |              | 0.3420 |
| Yes                                 | 77 (43.50%)   | 42 (37.84%)  |        |
| No                                  | 100 (56.50%)  | 69 (62.16%)  |        |
| Practice location - Rural           |               |              | 0.5375 |
| Yes                                 | 11 (6.21%)    | 5 (4.50%)    |        |
| No                                  | 166 (93.79%)  | 106 (95.50%) |        |
| Practice location - Academic        |               |              | 0.1057 |
| Yes                                 | 42 (23.73%)   | 36 (32.43%)  |        |
| No                                  | 135 (76.27%)  | 75 (67.57%)  |        |

|                                              |              |               |        |
|----------------------------------------------|--------------|---------------|--------|
| Practice setting - Hospital Employee         |              |               | 0.3216 |
| Yes                                          | 20 (11.30%)  | 17 (15.32%)   |        |
| No                                           | 157 (88.70%) | 94 (84.68%)   |        |
| Practice setting - Multispecialty group      |              |               | 0.0306 |
| Yes                                          | 17 (9.60%)   | 3 (2.70%)     |        |
| No                                           | 160 (90.40%) | 108 (97.30%)  |        |
| Practice setting - Private group             |              |               | 0.7685 |
| Yes                                          | 36 (20.34%)  | 21 (18.92%)   |        |
| No                                           | 141 (79.66%) | 90 (81.08%)   |        |
| Practice setting - Private solo              |              |               | 0.3678 |
| Yes                                          | 65 (36.72%)  | 35 (31.53%)   |        |
| No                                           | 112 (63.28%) | 76 (68.47%)   |        |
| Practice setting - Not practicing clinically |              |               | 0.5246 |
| Yes                                          | 2 (1.13%)    | 0 (0.00%)     |        |
| No                                           | 175 (98.87%) | 111 (100.00%) |        |

---

**B) Reason for choosing or not choosing an academic career with comparison of responses between males and females (N=288).**

|                                         | <b>Male</b><br><b>(n=177)</b> | <b>Female</b><br><b>(n=111)</b> | <b>P-value</b> |
|-----------------------------------------|-------------------------------|---------------------------------|----------------|
| Desire for academic career (n=121)      |                               |                                 | 0.3428         |
| Clinical Diversity/Types of Cases       | 30 (16.95%)                   | 23 (20.72%)                     |                |
| Desire for research opportunity         | 4 (2.26%)                     | 5 (4.50%)                       |                |
| Desire to teach                         | 32 (18.08%)                   | 17 (15.32%)                     |                |
| More than one equally                   | 4 (2.26%)                     | 0 (0.00%)                       |                |
| Other                                   | 3 (1.69%)                     | 3 (2.70%)                       |                |
| Reason did not choose academics (n=188) |                               |                                 | 0.0047         |
| Bad experience in academic              | 1 (0.56%)                     | 2 (1.80%)                       |                |
| Desire for autonomy                     | 83 (46.89%)                   | 40 (36.04%)                     |                |
| Flexible schedule                       | 3 (1.69%)                     | 9 (8.11%)                       |                |
| Focus on clinical                       | 4 (2.26%)                     | 0 (0.00%)                       |                |
| Increased earning potential             | 23 (12.99%)                   | 4 (3.60%)                       |                |

|                                  |           |           |
|----------------------------------|-----------|-----------|
| Job Opportunity and availability | 3 (1.69%) | 4 (3.60%) |
| Other                            | 5 (2.82%) | 2 (1.80%) |
| Scope of cases                   | 3 (1.69%) | 2 (1.80%) |

---
