# Supplementary material for: Another Day, Another 82 Cents: A National Survey Assessing Gender-based Wage Differences in Board-certified Plastic Surgeons
Source: PubMed Central journal article supplement — Plast Reconstr Surg Glob Open. 2023 Aug 15;11(8):e5196. doi: 10.1097/GOX.0000000000005196 (PMC10427058; doi:10.1097/gox.0000000000005196), 2023-08-15
Supplement: gox-11-e5196-s010.pdf [file gox-11-e5196-s010.pdf]

### Supplemental Digital Content 10.

A) Responses that addressed leadership roles achieved and leadership goals with comparison of male and female responses to Questions 34, 35, 36, and 37 (N=288).

|                                   | <b>Male</b><br><b>(n=177)</b> | <b>Female</b><br><b>(n=111)</b> | <b>P-value</b> |
|-----------------------------------|-------------------------------|---------------------------------|----------------|
| Highest position achieved (n=155) |                               |                                 | 0.2040         |
| Assistant Professor               | 37 (20.90%)                   | 34 (30.63%)                     |                |
| Associate Professor               | 32 (18.08%)                   | 14 (12.61%)                     |                |
| Clinical Professor                | 10 (5.65%)                    | 4 (3.60%)                       |                |
| Full Professor                    | 16 (9.04%)                    | 8 (7.21%)                       |                |
| Fellowship Director               |                               |                                 | 0.8203         |
| Yes                               | 7 (3.95%)                     | 5 (4.50%)                       |                |
| No                                | 170 (96.05%)                  | 106 (95.50%)                    |                |
| Program Director                  |                               |                                 | 0.7358         |
| Yes                               | 13 (7.34%)                    | 7 (6.31%)                       |                |
| No                                | 164 (92.66%)                  | 104 (93.69%)                    |                |

|                            |              |              |        |
|----------------------------|--------------|--------------|--------|
| Division Chief             |              |              | 0.3439 |
| Yes                        | 26 (14.69%)  | 12 (10.81%)  |        |
| No                         | 151 (85.31%) | 99 (89.19%)  |        |
| Department Chair           |              |              | 0.5391 |
| Yes                        | 8 (4.52%)    | 3 (2.70%)    |        |
| No                         | 169 (95.48%) | 108 (97.30%) |        |
| None                       |              |              | 0.1362 |
| Yes                        | 52 (29.38%)  | 42 (37.84%)  |        |
| No                         | 125 (70.62%) | 69 (62.16%)  |        |
| N/A                        |              |              | 0.8579 |
| Yes                        | 32 (18.08%)  | 21 (18.92%)  |        |
| No                         | 145 (81.92%) | 90 (81.08%)  |        |
| Associate Program Director |              |              | 0.1118 |
| Yes                        | 2 (1.13%)    | 5 (4.50%)    |        |
| No                         | 175 (98.87%) | 106 (95.50%) |        |
| Section/Center Chief       |              |              | 0.4112 |

|                                                                                   |              |              |        |
|-----------------------------------------------------------------------------------|--------------|--------------|--------|
| Yes                                                                               | 5 (2.82%)    | 1 (0.90%)    |        |
| No                                                                                | 172 (97.18%) | 110 (99.10%) |        |
| Leadership roles (editorial board,<br>CEO, CFO, committee chair, etc.)<br>(n=246) |              |              | 0.1589 |
| Yes                                                                               | 55 (31.07%)  | 29 (26.13%)  |        |
| No                                                                                | 91 (51.41%)  | 71 (63.96%)  |        |
| Goal to hold leadership roles in<br>future (n=248)                                |              |              | 0.0726 |
| Yes                                                                               | 48 (27.12%)  | 43 (38.74%)  |        |
| No                                                                                | 101 (57.06%) | 56 (50.45%)  |        |
| H-index (n=107)                                                                   |              |              | 0.1959 |
| Median (IQR)                                                                      | 8 (4-16)     | 5 (2-12)     |        |
| Range                                                                             | 0-129        | 0-54         |        |

---

**B) Responses to Question 34 which show differences between the highest academic title achieved based on board-certification year, further stratified by gender.**

---

|                        | <b>Board-certified Year</b> | <b>Board-certified Year</b> | <b>Board-certified Year</b> |
|------------------------|-----------------------------|-----------------------------|-----------------------------|
|                        | <b>P-value, Mean (SD)</b>   | <b>P-value, Mean (SD)</b>   | <b>P-value, Mean (SD)</b>   |
|                        | <b>Full sample (N=288)</b>  | <b>Males (n=177)</b>        | <b>Females (n=111)</b>      |
| Highest Academic Title | P=0.0397                    | P=0.0522                    | P=0.4434                    |
| Full Professor         | 1999 (10)                   | 1996 (10)                   | 2005 (8)                    |
| Non-Full Professor     | 2004 (12)                   | 2002 (11)                   | 2008 (11)                   |

C) Responses regarding mentorship of individuals including number of mentors and characterization of mentors, with comparison of responses between males and females. Responses collected from Questions 39 and 40 (N=288).

| <b>Characteristic</b>     | <b>Male</b>    | <b>Female</b>  | <b>P-value</b> |
|---------------------------|----------------|----------------|----------------|
|                           | <b>(n=177)</b> | <b>(n=111)</b> |                |
| Number of mentors (n=249) |                |                | 0.2909         |
| 0-3                       | 79 (44.63%)    | 51 (45.95%)    |                |
| 4-7                       | 60 (33.90%)    | 44 (39.64%)    |                |
| 8-11                      | 6 (3.39%)      | 1 (0.90%)      |                |
| >11                       | 3 (1.69%)      | 5 (4.50%)      |                |

|                                      |              |             |         |
|--------------------------------------|--------------|-------------|---------|
| Has female mentor                    |              |             | <0.0001 |
| Yes                                  | 39 (22.03%)  | 53 (47.75%) |         |
| No                                   | 138 (77.97%) | 58 (52.25%) |         |
| Has ethnic or racial minority mentor |              |             | 0.5251  |
| Yes                                  | 45 (25.42%)  | 32 (28.83%) |         |
| No                                   | 132 (74.58%) | 79 (71.17%) |         |
| Has long-distance mentor             |              |             | 0.3571  |
| Yes                                  | 70 (39.55%)  | 50 (45.05%) |         |
| No                                   | 107 (60.45%) | 61 (54.95%) |         |

**D)** Responses that regarded impact of gender, race, ethnicity on professional goals and accomplishments, comparing males to females. Responses taken from Questions 41, 42, and 43 (N=288).

|                                                                                            | <b>Male</b>    | <b>Female</b>  | <b>P-value</b> |
|--------------------------------------------------------------------------------------------|----------------|----------------|----------------|
|                                                                                            | <b>(n=177)</b> | <b>(n=111)</b> |                |
| Gender, race, or ethnicity significantly affected career goals and accomplishments (n=249) |                |                | <0.0001        |

|                                                                                                |              |             |        |
|------------------------------------------------------------------------------------------------|--------------|-------------|--------|
| Yes                                                                                            | 12 (6.78%)   | 48 (43.24%) |        |
| No                                                                                             | 136 (76.84%) | 53 (47.75%) |        |
| Additional factors not mentioned<br>affected professional goals and<br>accomplishments (n=249) |              |             | 0.4397 |
| Yes                                                                                            | 43 (24.29%)  | 34 (30.63%) |        |
| No                                                                                             | 105 (59.32%) | 67 (60.36%) |        |
