# Supplementary figures and images for: Another Day, Another 82 Cents: A National Survey Assessing Gender-based Wage Differences in Board-certified Plastic Surgeons
Source: PubMed Central journal article supplement — Plast Reconstr Surg Glob Open. 2023 Aug 15;11(8):e5196. doi: 10.1097/GOX.0000000000005196 (PMC10427058; doi:10.1097/gox.0000000000005196), 2023-08-15

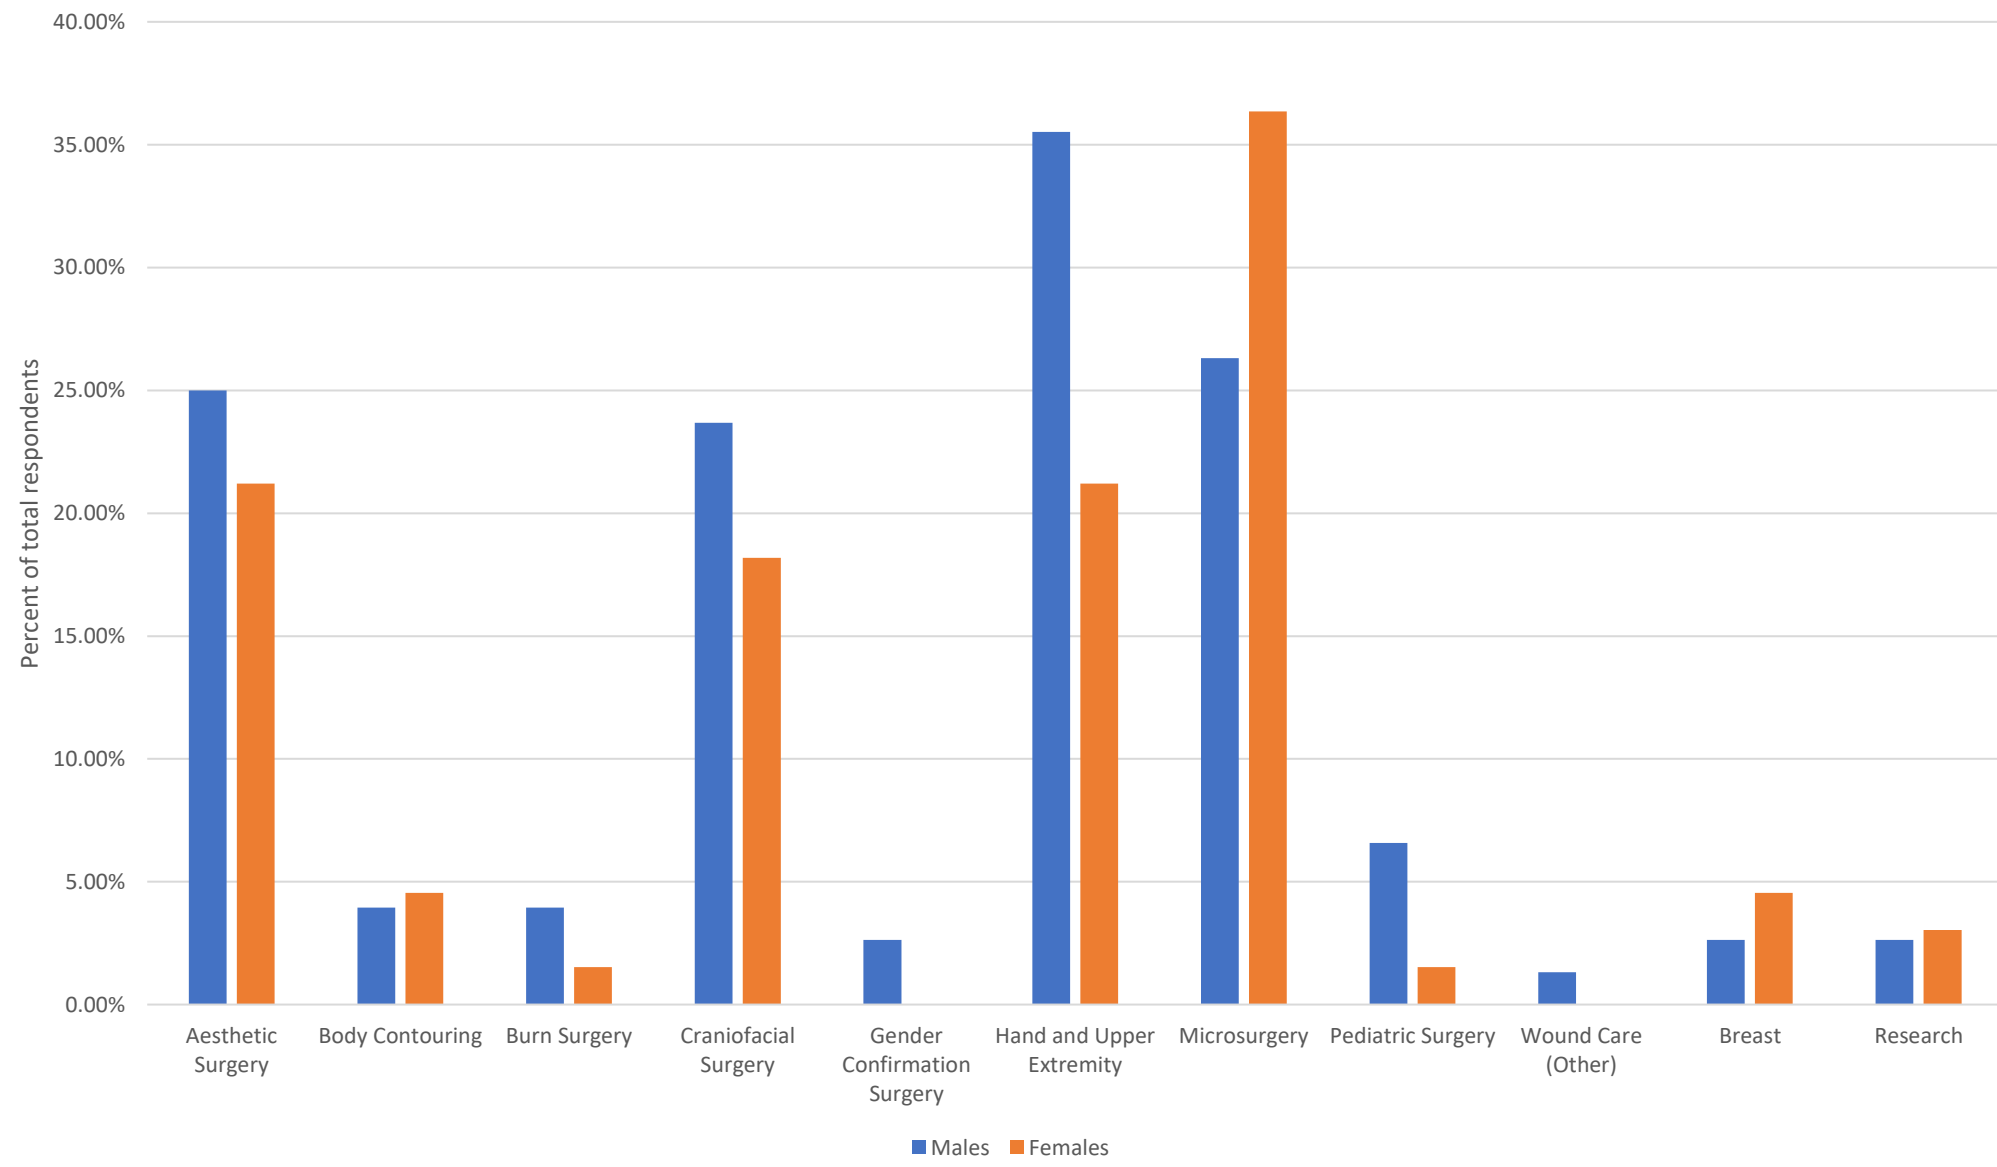

Supplement: gox-11-e5196-s005.pdf [file gox-11-e5196-s005.pdf]

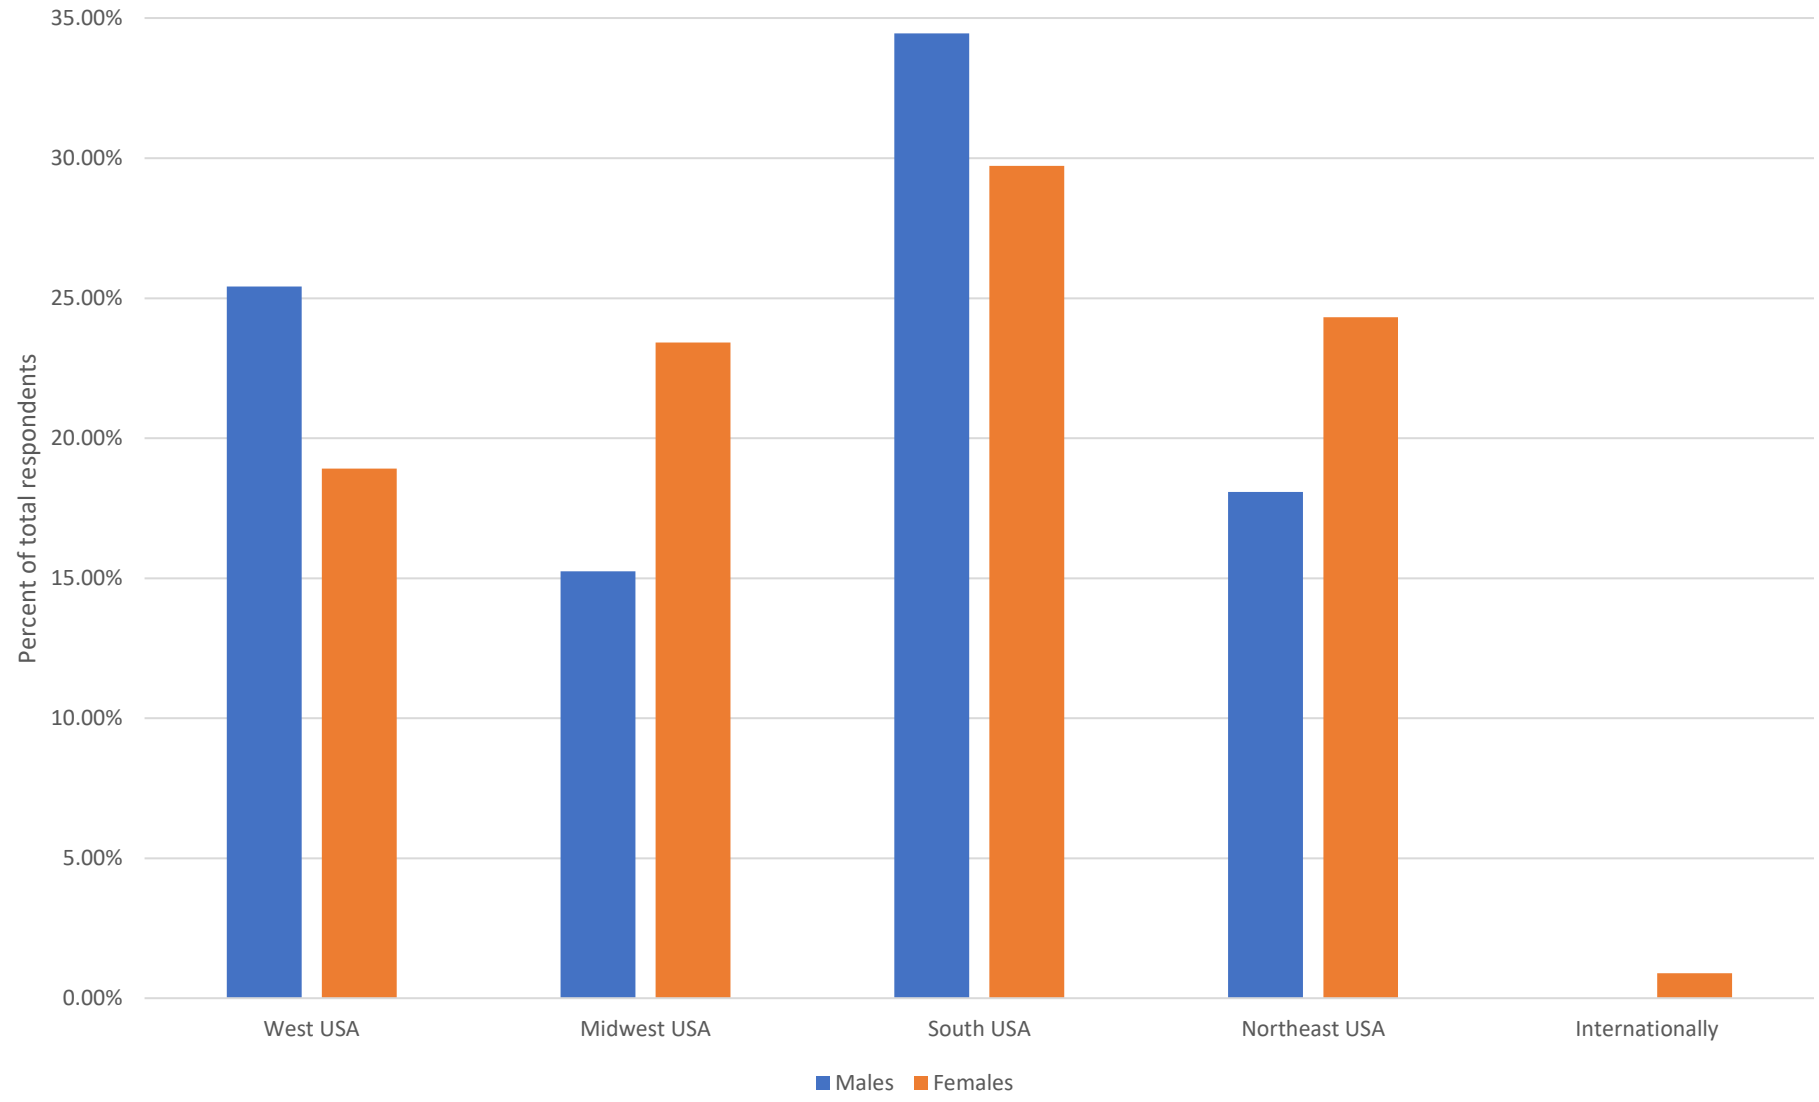

Supplement: gox-11-e5196-s007.pdf [file gox-11-e5196-s007.pdf]

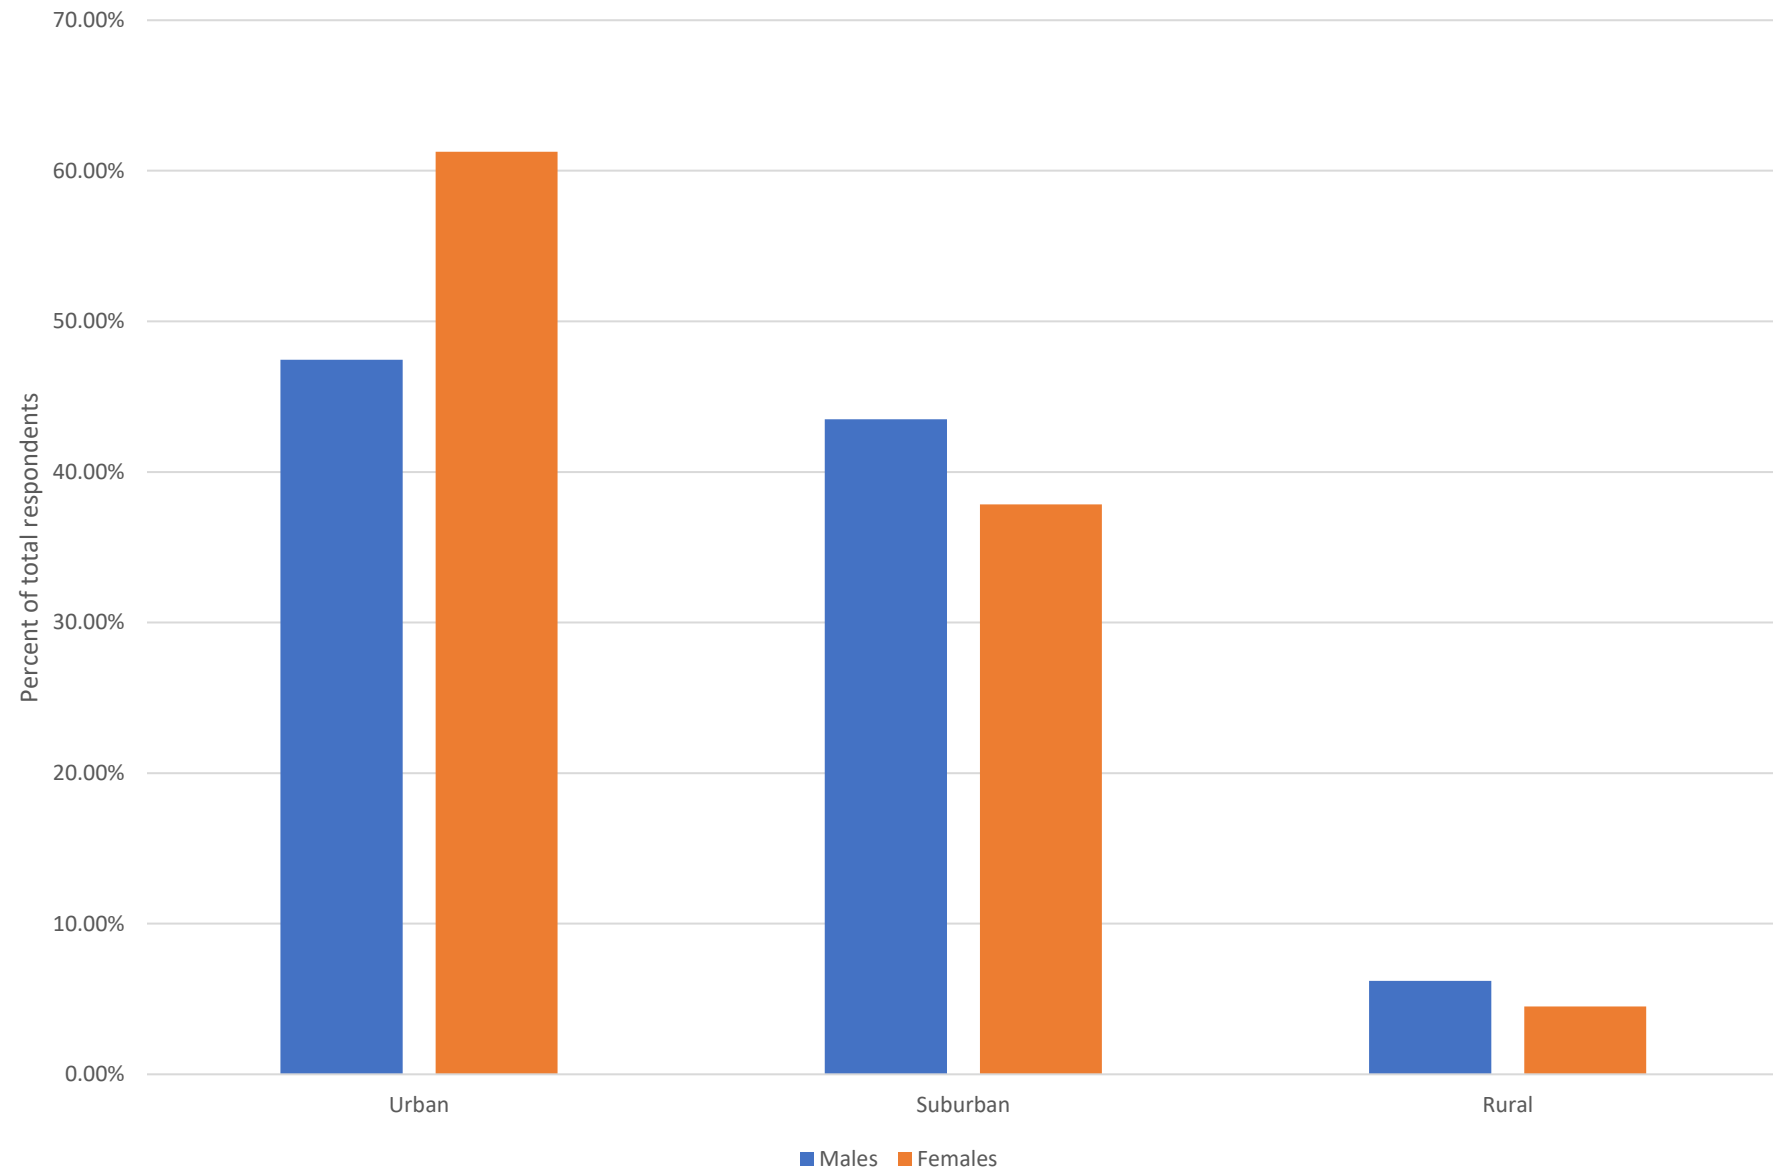

Supplement: gox-11-e5196-s008.pdf [file gox-11-e5196-s008.pdf]

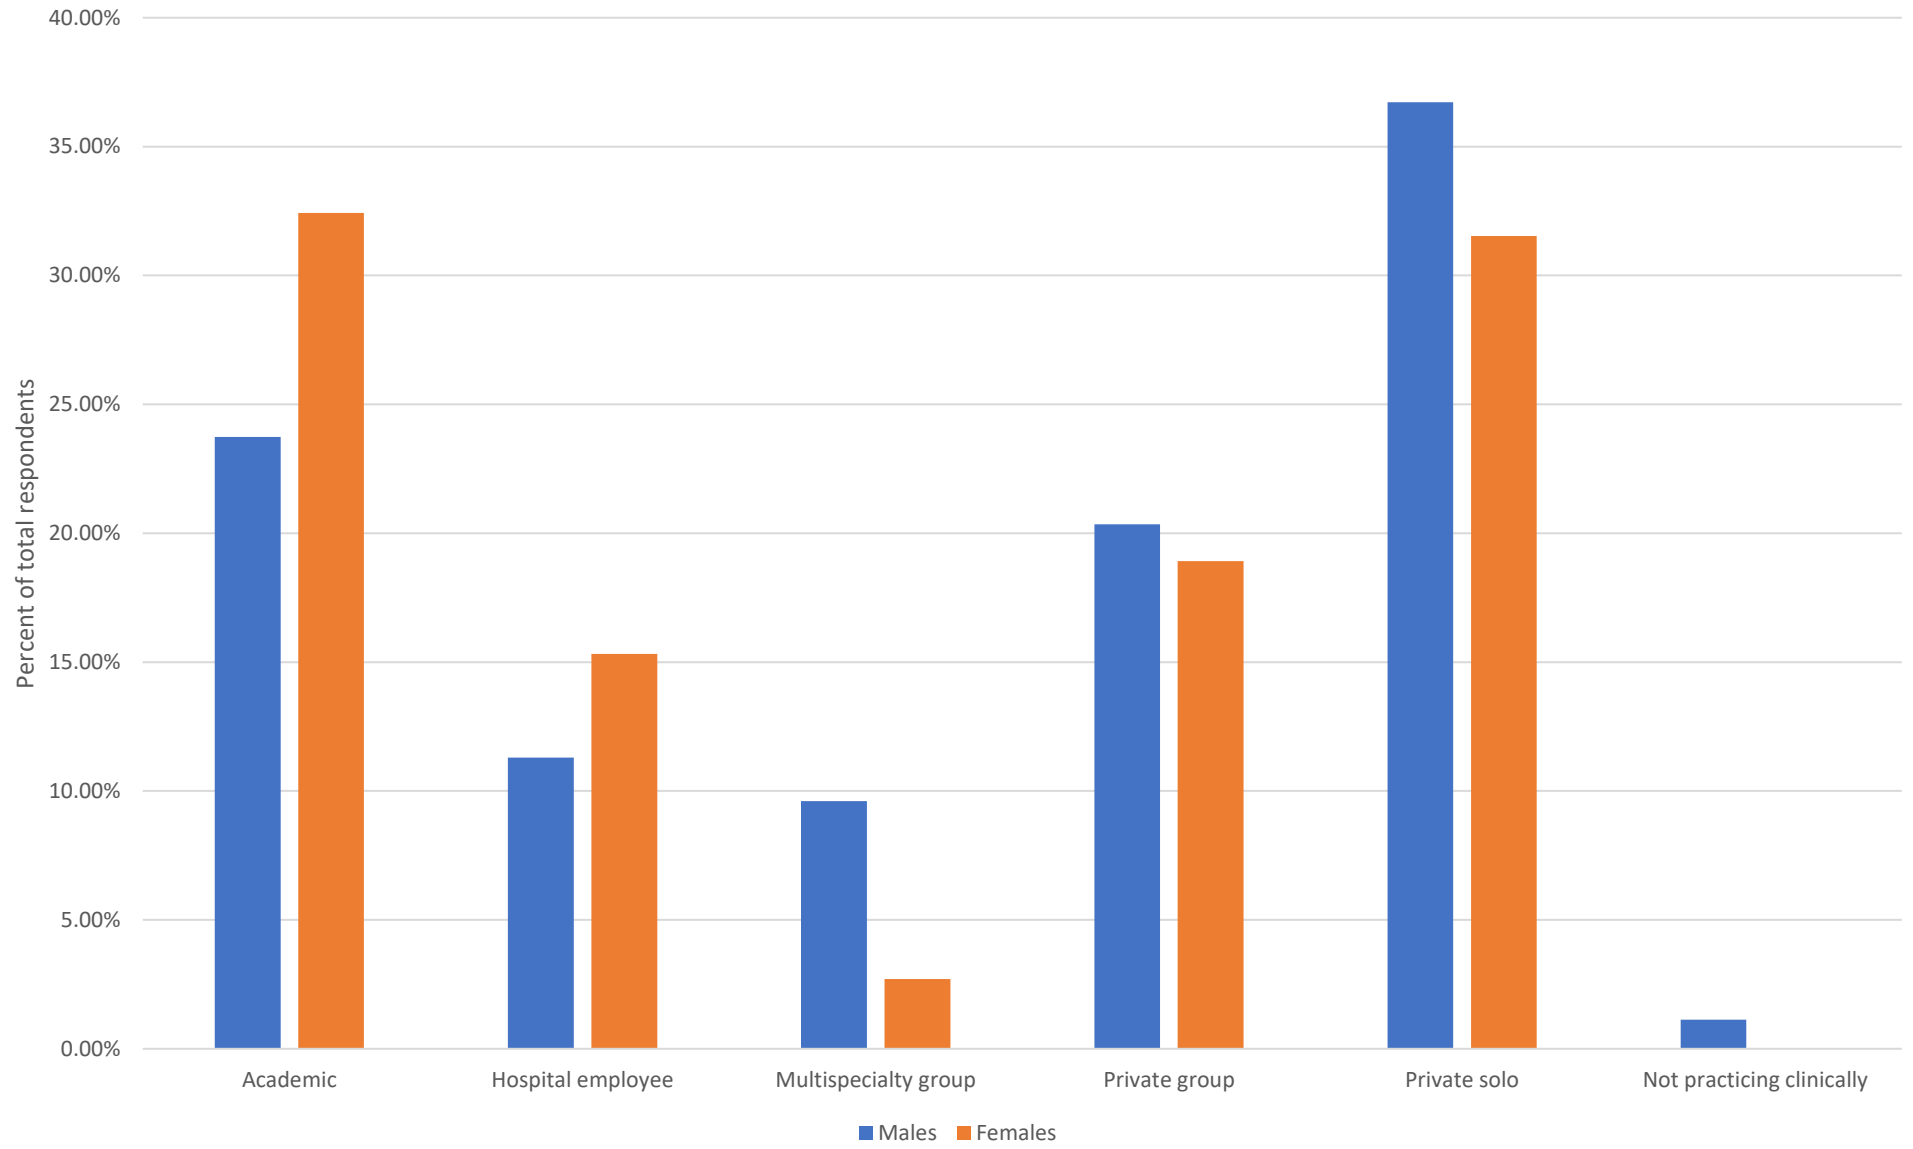

Supplement: gox-11-e5196-s009.pdf [file gox-11-e5196-s009.pdf]
